# Supplementary material for: Horizontal antimicrobial resistance transfer drives epidemics of multiple Shigella species
Source: PubMed Central journal article supplement (PMC5899146; doi:10.1038/s41467-018-03949-8), 2018-04-13
Supplement: 41467_2018_3949_MOESM3_ESM.pdf [file 41467_2018_3949_MOESM3_ESM.pdf]

## **Description of Additional Supplementary Files**

File Name: Supplementary Movie 1

Description: Animation of horizontal transmission of pKSR100.

File Name: Supplementary Data 1

Description: Metadata, accessions, and results for isolates used in this study.
